# Supplementary material for: Visible-light-induced photocatalysis and peroxymonosulfate activation over ZnFe2O4 fine nanoparticles for degradation of Orange II
Source: Royal Society of Chemistry journal article supplement (doi:10.1039/c5cy01735a), 2015-11-09
Supplement: c5cy01735a1.pdf [file c5cy01735a1.pdf]

**Visible-Light-Induced Photocatalysis and Peroxymonosulfate  
Activation over ZnFe<sub>2</sub>O<sub>4</sub> Fine Nanoparticles for Degradation of  
Orange II**

Kaixin Zhu<sup>a,b</sup>, Junhu Wang<sup>a,\*</sup>, Yanjie Wang<sup>a,b</sup>, Changzi Jin<sup>a</sup>, Ayyakannu Sundaram  
Ganeshraja<sup>a</sup>

*<sup>a</sup> Mössbauer Effect Data Center & Laboratory of Catalysts and New Materials for  
Aerospace, Dalian Institute of Chemical Physics, Chinese Academy of Science,  
Dalian 116023, China. Email: [wangjh@dicp.ac.cn](mailto:wangjh@dicp.ac.cn); Fax: +86 411 84685940; Tel:  
+86 411 84379159*

*<sup>b</sup> University of Chinese Academy of Sciences, Beijing 100049, China*

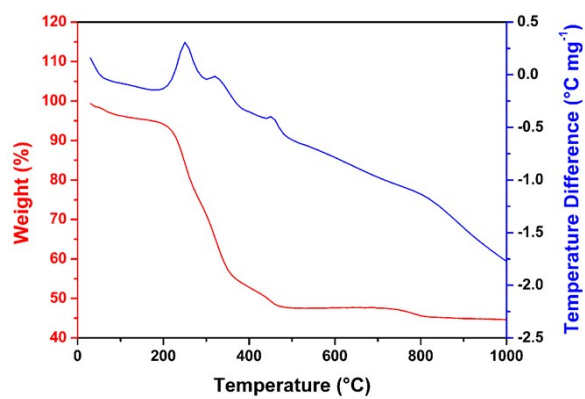

Fig. S1. TG-DSC curves of the ZnFe-120 sample.

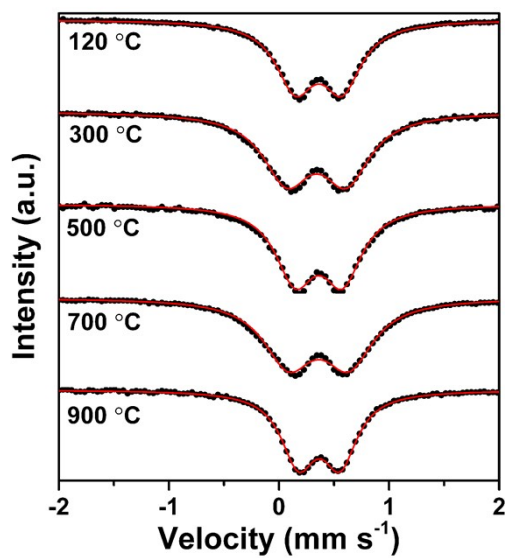

Fig. S2 Room temperature <sup>57</sup>Fe Mössbauer spectra of zinc ferrite samples calcined at different temperature.

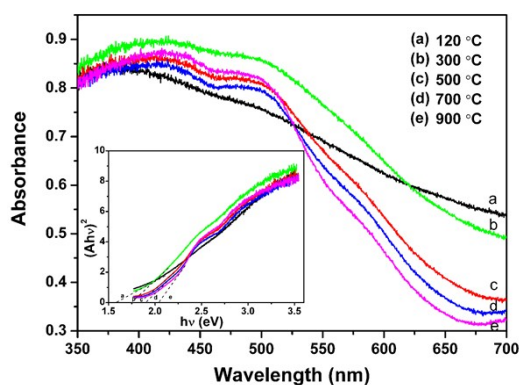

Fig. S3 UV-Vis DRS of zinc ferrites calcined at different temperature. Inset: Plots of  $(Ah\nu)^2$  versus  $h\nu$ . “A” in the Y axis refers to absorbance, proportional to absorption coefficient ( $\alpha$ ).

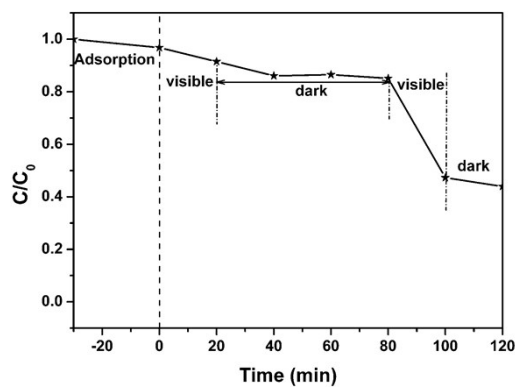

Fig. S4 Influence of visible light irradiation on the Orange II degradation performance of the ZnFe-500/PMS/vis system (Conditions: Orange II, 20 mg L<sup>-1</sup>; catalyst, 0.1 g L<sup>-1</sup>, PMS, 0.5 g L<sup>-1</sup>; visible light,  $\lambda \geq 420$  nm; ambient temperature)

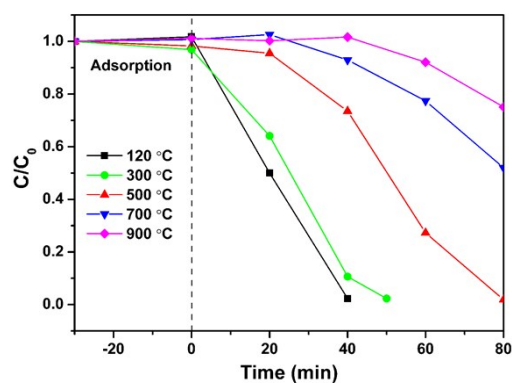

Fig. S5 Orange II degradation performance of the ZnFe-T/PMS/vis system (conditions: Orange II, 20 mg L<sup>-1</sup>; catalyst, 0.1 g L<sup>-1</sup>, PMS, 0.5 g L<sup>-1</sup>; visible light,  $\lambda \geq 420$  nm; ambient temperature).

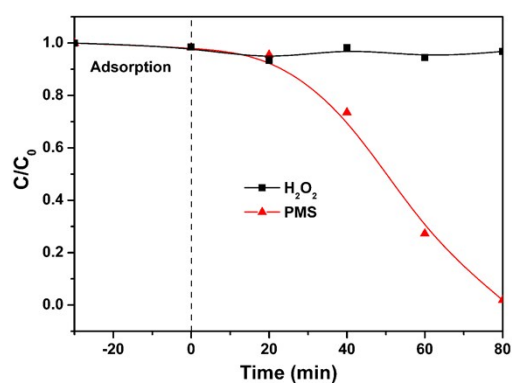

Fig. S6 Comparative activity of H<sub>2</sub>O<sub>2</sub> and PMS in the ZnFe-500/vis system. (conditions: Orange II, 20 mg L<sup>-1</sup>; catalyst, 0.1 g L<sup>-1</sup>, oxidant concentration: 0.8 mM; visible light,  $\lambda \geq 420$  nm; ambient temperature)

Table S1. Several parameters of zinc ferrites calcined at different temperature.

| Sample   | Crystallite size<br>(nm) | $S_{\text{BET}}$<br>( $\text{m}^2 \text{g}^{-1}$ ) | $E_{\text{g}}$<br>(eV) | Leaching (ppm) |        |
|----------|--------------------------|----------------------------------------------------|------------------------|----------------|--------|
|          |                          |                                                    |                        | Zn             | Fe     |
| ZnFe-120 | -                        | 22                                                 | 1.61                   | 10.26          | 4.330  |
| ZnFe-300 | 16.7                     | 60                                                 | 1.77                   | 9.056          | 0.9059 |
| ZnFe-500 | 18.9                     | 46                                                 | 1.86                   | 4.4270         | 0.5222 |
| ZnFe-700 | 41.7                     | 24                                                 | 1.92                   | 2.1430         | 0.1768 |
| ZnFe-900 | 104.2                    | 4                                                  | 2.06                   | 0.5010         | 0.2672 |

Table S2.  $^{57}\text{Fe}$  Mössbauer parameters of zinc ferrite samples calcined at different temperature.

| Sample   | IS <sup>a</sup>        | QS                     | Line Width             |
|----------|------------------------|------------------------|------------------------|
|          | ( $\text{mm s}^{-1}$ ) | ( $\text{mm s}^{-1}$ ) | ( $\text{mm s}^{-1}$ ) |
| ZnFe-120 | 0.36                   | 0.42                   | 0.43                   |
| ZnFe-300 | 0.34                   | 0.54                   | 0.52                   |
| ZnFe-500 | 0.36                   | 0.43                   | 0.43                   |
| ZnFe-700 | 0.36                   | 0.55                   | 0.55                   |
| ZnFe-900 | 0.36                   | 0.38                   | 0.38                   |

a) IS is relative to  $\alpha$ -iron.

Table S3. XPS data of the fresh ZnFe-500 sample, after one and two runs used.

| Sample    | Fresh      |           | After run 1 |           | After run 2 |           |
|-----------|------------|-----------|-------------|-----------|-------------|-----------|
|           | Atomic (%) | B.E. (eV) | Atomic (%)  | B.E. (eV) | Atomic (%)  | B.E. (eV) |
| <b>Zn</b> | 9.89       | 1021.6    | 8.61        | 1021.6    | 5.11        | 1021.5    |
|           |            | 1022.4    |             | -         |             | -         |
| <b>Fe</b> | 7.91       | 719.1     | 17.16       | 719.1     | 10.77       | 719.4     |
|           |            | 711.8     |             | 711.7     |             | 711.6     |
| <b>O</b>  | 44.91      | 530.0     | 49.42       | 530.1     | 40.28       | 530.1     |
|           |            | 531.6     |             | 531.4     |             | 531.8     |
|           |            | 536.4     |             | -         |             | -         |
